# Supplementary material
Source: MDPI journal article supplement (https://www.mdpi.com/2227-9717/10/5/1016)
Supplement: s1 [file s1 › processes-1690303-supplementary.pdf]

# GC–MS-based metabolites profiling, in vitro antioxidant, antimicrobial, and anticancer properties of different solvent extracts from leaves, stems, roots, and flowers of *Micromeria fruticosa* (Lamiaceae)

Mohammad Al-Nuri <sup>1\*,‡</sup>, Ibrahim M. Abu-Reidah <sup>2,3\*,‡</sup>, Anwar A. alhajeh <sup>1</sup>, Ghadeer Omar <sup>4</sup>, Ghaleb Adwan <sup>4</sup> and Ismail Warad <sup>1,5</sup>

<sup>1</sup> Department of Chemistry, An-Najah National University, Nablus, Palestine.

<sup>2</sup> School of Science and the Environment, Grenfell Campus, Memorial University of Newfoundland, Corner Brook, NL A2H 5G4, Canada.

<sup>3</sup> The Functional Foods Sensory Laboratory, Grenfell Campus, Memorial University of Newfoundland, Corner Brook, NL A2H 5G4, Canada

<sup>4</sup> Department of Biology and Biotechnology, An-Najah National University, Nablus, Palestine.

<sup>5</sup> Faculty of Pharmacy, Arab American University, P.O. Box 249, Jenin, Palestine.

\*Correspondence: maalnuri@najah.edu (M.A.-N.); iabureidah@gmail.com and [iabureidah@grenfell.mun.ca](mailto:iabureidah@grenfell.mun.ca) (I.M.A.-R.).

<sup>‡</sup> Both authors contributed equally to this work

**Table S1.** Phytochemical compounds identified in the extracts and plant parts of *Micromeria fruticosa*.

| Extract Type   | R.T.*<br>(min.) | R.I.** | Identity                                         | Class         | %Area | M.F.***                            | M.W.****<br>(g/mol) | Biological study                                                                                                                                                                                                            |
|----------------|-----------------|--------|--------------------------------------------------|---------------|-------|------------------------------------|---------------------|-----------------------------------------------------------------------------------------------------------------------------------------------------------------------------------------------------------------------------|
| Flower Ethanol | 18.44           | 796    | Menthone                                         | Monoterpene   | 30.05 | C <sub>10</sub> H <sub>18</sub> O  | 154.249             | Antimicrobial activity, antibiofilm, and antitumor activities                                                                                                                                                               |
|                | 19.20           | 866    | Menthol                                          | Monoterpene   | 21.22 | C <sub>10</sub> H <sub>20</sub> O  | 156.270             | Antibacterial, antifungal, antipruritic, anticancer, antioxidant, and cooling effects                                                                                                                                       |
|                | 20.82           | 816    | Pulegone                                         | Monoterpene   | 31.79 | C <sub>10</sub> H <sub>16</sub> O  | 152.233             | Antimicrobial, antioxidant, anti-inflammatory, antiulcer, and insecticidal properties                                                                                                                                       |
|                | 25.12           | 614    | 4,6-Decadiene                                    | -             | 0.86  | C <sub>10</sub> H <sub>18</sub>    | 138.250             | Antioxidant, antiasthmatic, and antibacterial                                                                                                                                                                               |
|                | 27.08           | 794    | β-caryophyllene                                  | Sesquiterpene | 4.14  | C <sub>15</sub> H <sub>2</sub>     | 204.300             | Anti-inflammatory, antioxidant, antinociceptive, neuro-protective, anxiolytic, antidepressant, antimicrobial, antidermatitic, antiacne, antiasthmatic, antiulcer, gastro-protective, sedative, and antispasmodic activities |
|                | 29.03           | 725    | β-Cubebene                                       | Sesquiterpene | 1.44  | C <sub>15</sub> H <sub>24</sub>    | 204.360             | Antioxidant activity                                                                                                                                                                                                        |
|                | 36.71           | 770    | Trans-1,2-diphenylcyclobutane                    | Cyclobutane   | 0.56  | C <sub>16</sub> H <sub>16</sub>    | 208.298             | Antitumor activity                                                                                                                                                                                                          |
|                | 54.65           | 558    | (2,3-diphenylcyclopropyl)methyl phenyl sulfoxide | Stilbene      | 0.74  | C <sub>22</sub> H <sub>20</sub> OS | 332.461             | Anticandidal and antioxidant activities                                                                                                                                                                                     |
|                | 59.01           | 559    | Oleamide                                         | Fatty amide   | 9.20  | C <sub>18</sub> H <sub>35</sub> NO | 281.477             | Anti-inflammatory, antibacterial, and antioxidant activities                                                                                                                                                                |

| Extract Type  | R.T. (min.) | R.I. | Identity                                                                      | Class                 | %Area | M.F.                                             | M.W.    | Biological Study                                                                |
|---------------|-------------|------|-------------------------------------------------------------------------------|-----------------------|-------|--------------------------------------------------|---------|---------------------------------------------------------------------------------|
| Flower Hexane | 18.14       | 849  | Menthone                                                                      | Monoterpene           | 5.42  | C <sub>10</sub> H <sub>18</sub> O                | 154.249 | Antimicrobial activity, potential antibiofilm, and antitumor activities         |
|               | 19.14       | 872  | Menthol                                                                       | Monoterpene           | 46.40 | C <sub>10</sub> H <sub>20</sub> O                | 156.270 | Antibacterial, antifungal, antipruritic, anticancer, and antioxidant activities |
|               | 22.63       | 777  | 8-Hydroxy-p-menth-4-en-3-one                                                  | Terpene-like          | 8.96  | C <sub>10</sub> H <sub>16</sub> O <sub>2</sub>   | 168.232 | No activity was recorded                                                        |
|               | 25.49       | 702  | 4-Pentyl-1-(trans-4-propylcyclohexyl)cyclohexene                              | -                     | 1.35  | C <sub>20</sub> H <sub>36</sub>                  | 276.508 | No activity was recorded                                                        |
|               | 29.73       | 722  | Ethyl 14-methyl-hexadecanoate                                                 | Fatty acid            | 1.95  | C <sub>18</sub> H <sub>36</sub> O <sub>2</sub>   | 284.0   | -                                                                               |
|               | 32.10       | 846  | 1-Formyl-2,2-Dimethyl-3-Trans-(3-Methyl-But-2-Enyl)-6-Methylidene-Cyclohexane | -                     | 1.76  | C <sub>15</sub> H <sub>24</sub> O                | 220.356 | Antifungal, insecticidal, and larvicidal agent                                  |
|               | 42.12       | 808  | Palmitic acid                                                                 | Fatty acid            | 3.63  | C <sub>16</sub> H <sub>32</sub> O <sub>2</sub>   | 256.400 | Antioxidant, anticancer, and anti-inflammation                                  |
|               | 42.87       | 890  | Ethyl 13-methyl-tetradecanoate                                                | Fatty acid            | 24.10 | C <sub>17</sub> H <sub>34</sub> O <sub>2</sub>   | 270.457 | Antioxidant, β-glucuronidase inhibitory, and anticancer activities              |
|               | 47.48       | 867  | Ethyl 10-bromodecanoate                                                       | Fatty acid derivative | 2.43  | C <sub>12</sub> H <sub>23</sub> BrO <sub>2</sub> | 279.214 | Antidiabetic activity                                                           |
|               | 51.72       | 841  | Methyl 17-methyl-octadecanoate                                                | Fatty acid            | 0.60  | C <sub>20</sub> H <sub>40</sub> O <sub>2</sub>   | 312.538 | Antibacterial agents, antioxidant and anticancer activities                     |
|               | 58.95       | 781  | Oleamide                                                                      | Fatty amide           | 3.39  | C <sub>18</sub> H <sub>35</sub> NO               | 281.477 | Anti-inflammatory, antibacterial, and antioxidant activities                    |

| Extract Type  | R.T (min.) | R.I. | Identity                            | Class                 | %Area | M.F.                                           | M.W.    | Biological Study                                                                                                                                                                                                            |
|---------------|------------|------|-------------------------------------|-----------------------|-------|------------------------------------------------|---------|-----------------------------------------------------------------------------------------------------------------------------------------------------------------------------------------------------------------------------|
| Leave Ethanol | 18.44      | 966  | Menthone                            | Monoterpene           | 14.59 | C <sub>10</sub> H <sub>18</sub> O              | 154.249 | Antimicrobial, antibiofilm, and antitumor activities                                                                                                                                                                        |
|               | 20.87      | 870  | Pulegone                            | Monoterpene           | 64.11 | C <sub>10</sub> H <sub>16</sub> O              | 152.233 | Antimicrobial, antioxidant, anti-inflammatory, antiulcer, and insecticidal properties                                                                                                                                       |
|               | 27.08      | 905  | Caryophyllene                       | Sesquiterpene         | 11.99 | C <sub>15</sub> H <sub>24</sub>                | 204.360 | Anti-inflammatory, antioxidant, antinociceptive, neuro-protective, anxiolytic, antidepressant, antimicrobial, antidermatitic, antiacne, antiasthmatic, antiulcer, gastro-protective, sedative, and antispasmodic activities |
|               | 29.03      | 865  | β-Cubebene                          | Sesquiterpene         | 3.96  | C <sub>15</sub> H <sub>24</sub>                | 204.351 | Antibacterial activity                                                                                                                                                                                                      |
|               | 36.70      | 863  | Trans-1,2-diphenylcyclobutane       | Cyclobutane           | 1.03  | C <sub>16</sub> H <sub>16</sub>                | 208.304 | Agonist activity                                                                                                                                                                                                            |
|               | 46.26      | 889  | Methyl 8, 11, 14-heptadecatrienoate | Fatty acid derivative | 4.32  | C <sub>18</sub> H <sub>30</sub> O <sub>2</sub> | 278.436 | No activity was recorded                                                                                                                                                                                                    |

| Extract Type | R.T (min.) | R.I. | Identity    | Class       | %Area | M.F                                | M.W.    | Biological Study                                         |
|--------------|------------|------|-------------|-------------|-------|------------------------------------|---------|----------------------------------------------------------|
| Leave Hexane | 7.14       | 898  | Styrene     | -           | 5.55  | C <sub>8</sub> H <sub>8</sub>      | 104.150 | Agonist activity                                         |
|              | 17.61      | 717  | Terpinolene | Monoterpene | 2.56  | C <sub>10</sub> H <sub>16</sub>    | 136.234 | Antioxidant, antiasthmatic, and antibacterial activities |
|              | 18.14      | 920  | Menthone    | Monoterpene | 9.10  | C <sub>10</sub> H <sub>18</sub> O. | 154.249 | Antimicrobial, antibiofilm, and antitumor activities     |

|  |       |     |                               |              |       |                                                |         |                                                                                        |
|--|-------|-----|-------------------------------|--------------|-------|------------------------------------------------|---------|----------------------------------------------------------------------------------------|
|  | 19.19 | 853 | Menthol                       | Monoterpene  | 17.82 | C <sub>10</sub> H <sub>20</sub> O              | 156.270 | Antibacterial, antifungal, antipruritic, anticancer, and antioxidant activities        |
|  | 20.88 | 823 | Pulegone                      | Monoterpene  | 10.66 | C <sub>10</sub> H <sub>16</sub> O              | 152.233 | Antimicrobial, antioxidant, anti-inflammatory, antiulcer, and insecticidal properties. |
|  | 22.67 | 701 | 8-Hydroxy-p-menth-4-en-3-one  | Terpene-like | 4.03  | C <sub>10</sub> H <sub>16</sub> O <sub>2</sub> | 168.232 | No activity was recorded                                                               |
|  | 36.69 | 858 | Trans-1,2-diphenylcyclobutane | Cyclobutane  | 4.17  | C <sub>16</sub> H <sub>16</sub>                | 208.304 | Agonist activity                                                                       |
|  | 42.10 | 585 | Palmitic acid                 | Fatty acid   | 6.33  | C <sub>16</sub> H <sub>32</sub> O <sub>2</sub> | 256.400 | Antioxidant, anticancer, food additive, and anti-inflammation                          |
|  | 46.25 | 847 | Methyl-hydroxylinolenate      | Fatty acid   | 7.59  | C <sub>19</sub> H <sub>32</sub> O <sub>3</sub> | 308.462 | No activity was recorded                                                               |
|  | 58.94 | 771 | Oleamide                      | Fatty amide  | 32.19 | C <sub>18</sub> H <sub>35</sub> NO             | 281.477 | Anti-inflammatory, antibacterial, and antioxidant activities                           |

| Extract Type | R.T (min.) | R.I. | Identity       | Class              | %Area | M.F.                               | M.W.    | Biological Study                                                                      |
|--------------|------------|------|----------------|--------------------|-------|------------------------------------|---------|---------------------------------------------------------------------------------------|
| Stem Hexane  | 19.20      | 880  | Menthol        | Monoterpene        | 66.61 | C <sub>10</sub> H <sub>20</sub> O  | 156.270 | Antibacterial, antifungal, antipruritic, anticancer, and antioxidant activities       |
|              | 54.75      | 887  | Hentriacontane | Alkane hydrocarbon | 4.40  | C <sub>31</sub> H <sub>64</sub>    | 436.850 | Antifungal, antioxidant, antitumor, and antibacterial activities                      |
|              | 58.93      | 766  | Oleamide       | Fatty amide        | 28.99 | C <sub>18</sub> H <sub>35</sub> NO | 281.477 | Anti-inflammatory, antibacterial, and antioxidant activities                          |
| Stem Ethanol | 19.21      | 864  | Menthol        | Monoterpene        | 100   | C <sub>10</sub> H <sub>20</sub> O  | 156.270 | Antibacterial, antifungal, antipruritic, anticancer, cooling, and antioxidant effects |

| Extract Type  | R.T. (min.) | R.I. | Identity                       | Class              | %Area | M.F.                                           | M.W. (g/mol) | Biological study                                                                |
|---------------|-------------|------|--------------------------------|--------------------|-------|------------------------------------------------|--------------|---------------------------------------------------------------------------------|
| Roots Ethanol | 37.902      | 824  | Cis-1-Chloro-9-Octadecene      | -                  | 8.30  | C <sub>18</sub> H <sub>35</sub> Cl             | 286.923      | -                                                                               |
|               | 42.929      | 884  | Ethyl 14-Methyl-Hexadecanoate  | -                  | 26.82 | C <sub>18</sub> H <sub>36</sub> O <sub>2</sub> | 284.477      | -                                                                               |
| Roots Hexane  | 19.204      | 801  | Menthol                        | Monoterpene        | 3.61  | C <sub>10</sub> H <sub>20</sub> O              | 156.27       | Antibacterial, antifungal, antipruritic, anticancer, and antioxidant activities |
|               | 42.159      | 814  | Palmitic acid                  | Fatty acid         | 8.24  | C <sub>16</sub> H <sub>32</sub> O <sub>2</sub> | 256.4        | Antioxidant, anticancer, food additive, and anti-inflammation                   |
|               | 42.934      | 902  | Ethyl 13-Methyl-Tetradecanoate | Fatty acid         | 47.52 | C <sub>17</sub> H <sub>34</sub> O <sub>2</sub> | 270.457      | -                                                                               |
|               | 54.433      | 823  | Diisooctyl phthalate           |                    | 6.25  | C <sub>24</sub> H <sub>38</sub> O <sub>4</sub> | 390.556      | Antioxidant, antimicrobial, and antifouling                                     |
|               | 58.965      | 750  | Oleamide                       | Fatty amide        | 14.61 | C <sub>18</sub> H <sub>35</sub> NO             | 281.477      | Anti-inflammatory, antibacterial, and antioxidant activities                    |
|               | 61.036      | 926  | Hentriacontane                 | Alkane hydrocarbon | 19.77 | C <sub>31</sub> H <sub>64</sub>                | 436.85       | Antifungal, antioxidant, antitumor, and antibacterial activities                |

\*RT: retention time, \*\*R.I.: relative index, \*\*\*M.F.: molecular formula, \*\*\*\*M.W. molecular weight.

## **S2. Media and Solutions**

### **1.1. Nutrient Broth**

Nutrient broth (ACUMEDIA) was prepared according to the manufacturer's instructions labeled on the bottle. A total of 2.0 g of nutrient broth medium was dissolved in 250 mL of deionized water. The broth was then distributed into tubes with 5-10 mL each and plugged with cotton. The tubes were autoclaved at 121°C for 15 minutes and allowed to cool to room temperature, then stored in a refrigerator.

### **1.2. Mueller–Hinton Broth**

Mueller–Hinton broth (Hi Media Laboratories) was prepared according to the manufacturer's instructions labeled on the bottle. A total of 5.25g of Mueller–Hinton Broth medium was dissolved in 250 mL of deionized water. The broth was then distributed into tubes with 5-10 mL each and plugged with cotton. The tubes were autoclaved at 121°C for 15 minutes, allowed to cool, and then kept in a refrigerator at 4-6°C.

### **1.3. Mueller–Hinton Agar (MHA)**

Mueller–Hinton agar (BD) was prepared according to the manufacturer's instructions labeled on the bottle. A total of 19 g of Mueller–Hinton agar medium was dissolved in 0.5 L of deionized water. The solution was allowed to boil for 1 minute and then autoclaved at 121°C for 15 minutes. After that, it was allowed to cool to about 55°C, and the media was poured into sterile Petri dishes with 25-30 mL each. Then, the plates were left overnight at room temperature. The following morning, the Petri dishes were turned upside down and kept in a refrigerator at 4-6°C.

### **1.4. Sabouraud Dextrose Agar**

Sabouraud dextrose agar (Hi Media Laboratories) was prepared according to the manufacturer's instructions labeled on the bottle. A total of 16.25 g of Sabouraud dextrose agar medium was dissolved in 0.25 L of deionized water. The solution was allowed to boil for 1 minute and then autoclaved at 121°C for 15 minutes. After that, it was allowed to cool to about 55°C, and the medium was poured into sterile Petri dishes with 25-30 mL each;

then, the plates were left overnight at room temperature. The following morning, the Petri dishes were turned upside down and kept in a refrigerator at 4-6°C.

### **1.5. Normal Saline (0.9% NaCl)**

*Normal saline* solution (0.9% NaCl, MWt 58.44) was prepared by dissolving 2.25 g of NaCl in 250 mL of deionized water. The saline solution was then distributed into tubes with 5-10 mL each and plugged with cotton. The tubes were autoclaved at 121°C for 15 min, allowed to cool, and then kept in a refrigerator at 4-6°C.

### **1.6. Preparation of McFarland turbidity standard No. 0.5**

McFarland 0.5 turbidity standard was prepared by mixing 50 µL of a 1.175% (w/v) barium chloride dihydrate ( $\text{BaCl}_2 \cdot 2\text{H}_2\text{O}$ ) solution and 9.95 mL of 1% (v/v) sulfuric acid. The tube, which had the 0.5 McFarland standard, was then sealed with parafilm to prevent evaporation and stored in the dark at room temperature. The 0.5 McFarland standard was vigorously mixed on a vortex mixer before use. As with the barium sulfate standards, a 0.5 McFarland standard is comparable to a bacterial suspension of  $1\text{-}5 \times 10^8$  colony-forming units (CFU)/mL (Andrews, 2006) [54], or 0.5 McFarland standard is similar to a *Candida albicans* suspension of  $1\text{-}5 \times 10^6$  yeast cells/mL.

Three to four colonies of each bacterium were transferred into tubes with 5.0-10 mL of sterile normal saline, and the turbidity of the bacterial suspensions was adjusted to have similar turbidity to 0.5 McFarland standard with a bacterial suspension of about  $1.5 \times 10^8$  cfu/mL. A few colonies from *C. albicans* sub-cultured on Sabouraud dextrose agar were transferred into tubes with 5.0-10 mL of sterile normal saline. The turbidity of the yeast *C. albicans* suspension was about  $1\text{-}5 \times 10^6$  yeast cells/mL.
